# Supplementary material for: mTORC1 Mediates Biphasic Mechano‐Response to Orchestrate Adhesion‐Dependent Cell Growth and Anoikis Resistance
Source: PubMed Central journal article supplement (PMC10853740; doi:10.1002/advs.202307206), 2023-12-02
Supplement: ADVS-11-2307206-s001.pdf [file ADVS-11-2307206-s001.pdf]

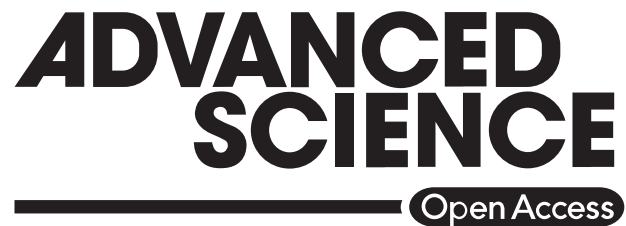

## Supporting Information

for *Adv. Sci.*, DOI 10.1002/adv.202307206

mTORC1 Mediates Biphasic Mechano-Response to Orchestrate Adhesion-Dependent Cell Growth and Anoikis Resistance

*Chunlei Zhang, Yuan Wang, Zifeng Zhen, Jiayi Li, Jing Su and Congying Wu\**

## Supplementary Materials for

- **mTORC1 mediates biphasic mechano-response to orchestrate adhesion-dependent cell growth and anoikis resistance**

Chunlei Zhang *et al.*

\*Corresponding author: Congying Wu, [congyingwu@hsc.pku.edu.cn](mailto:congyingwu@hsc.pku.edu.cn)

### **This PDF file includes:**

Figs. S1 to S5

Legends for Figs. S1 to S5

Figure S1

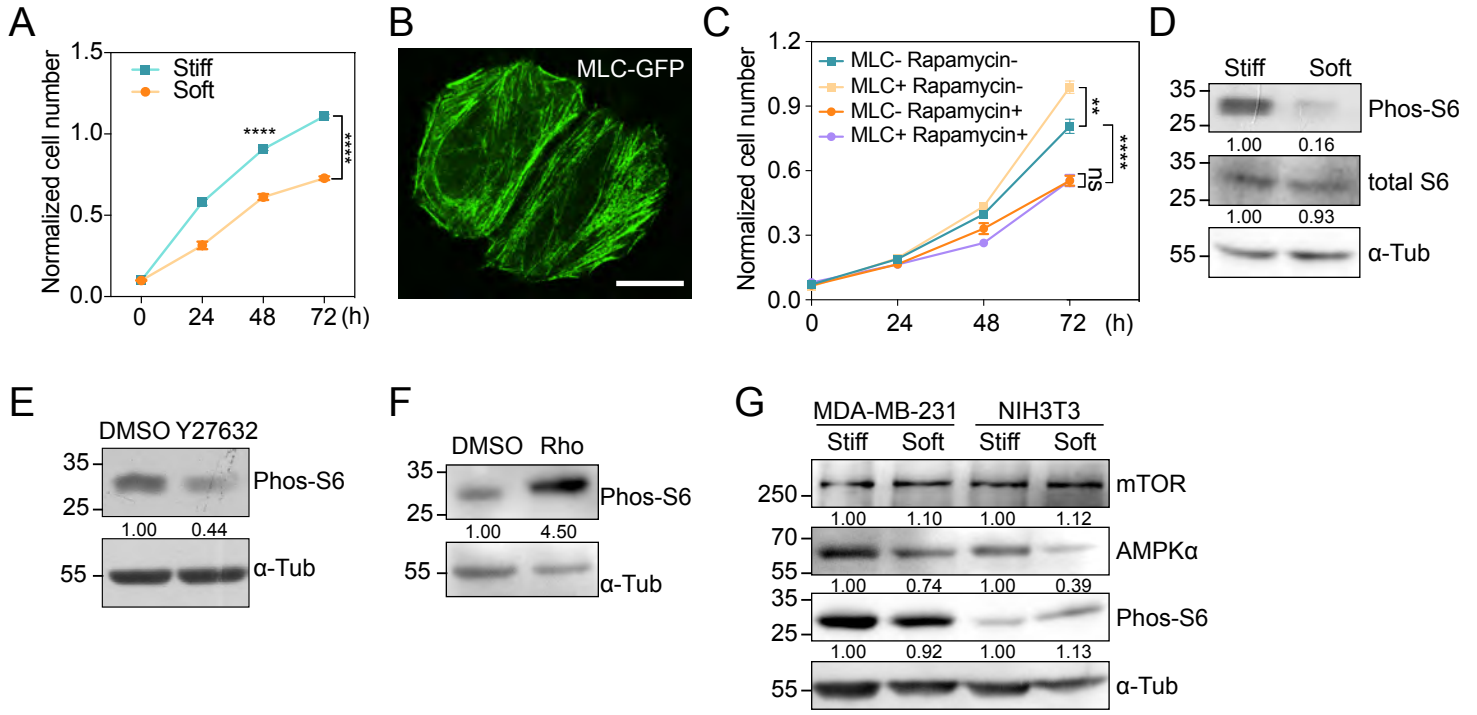

**Fig. S1. mTORC1 signaling responds to different mechanical conditions**

- (A) Cell growth curve determined by CCK-8 assay at 0, 24, 48 and 72 h. Cell number of MDA-MB-231 was measured on stiff or soft substrates ( $N_{\text{stiff}} = N_{\text{soft}} = 3$  independent samples, error bar: mean with SEM, \*\*\*\* $p < 0.0001$  by unpaired Student's  $t$  test).
- (B) Representative images of overexpressed MLC-GFP in MDA-MB-231 cells. Scale bar, 20  $\mu\text{m}$ .
- (C) Cell growth curve determined by CCK-8 assay at 0, 24, 48 and 72 h under blebbistatin treatment. Cell number of MDA-MB-231 was measured in MLC- Rapamycin-, MLC+ Rapamycin-, MLC- Rapamycin+, MLC+ Rapamycin+ groups (error bar: mean with SEM,  $n_{\text{MLC- Rapamycin+ vs MLC- Rapamycin+}} > 0.9999$ , \*\*\*\* $p < 0.0001$ , \*\* $p = 0.0036$  by one-way ANOVA for multiple comparison).
- (D) Western blot showing Phos-S6 and total S6 levels in HRPE cells plated on stiff or soft substrates.  $\alpha$ -tubulin is used as loading control.
- (E) Western blot showing the Phos-S6 levels in stiff cultured cells treated with DMSO or ROCK inhibitor Y27632.  $\alpha$ -tubulin is used as loading control.
- (F) Western blot showing the Phos-S6 levels in soft cultured cells treated with DMSO or Rho activator II (Rho).  $\alpha$ -tubulin is used as loading control.
- (G) Western blot showing the mTOR, AMPK $\alpha$  and Phos-S6 levels in MDA-MB-231 and NIH3T3 cells cultured on stiff or soft substrates, with serum concentrations reducing to 1% during experiments.  $\alpha$ -tubulin is used as loading control.

Figure S2

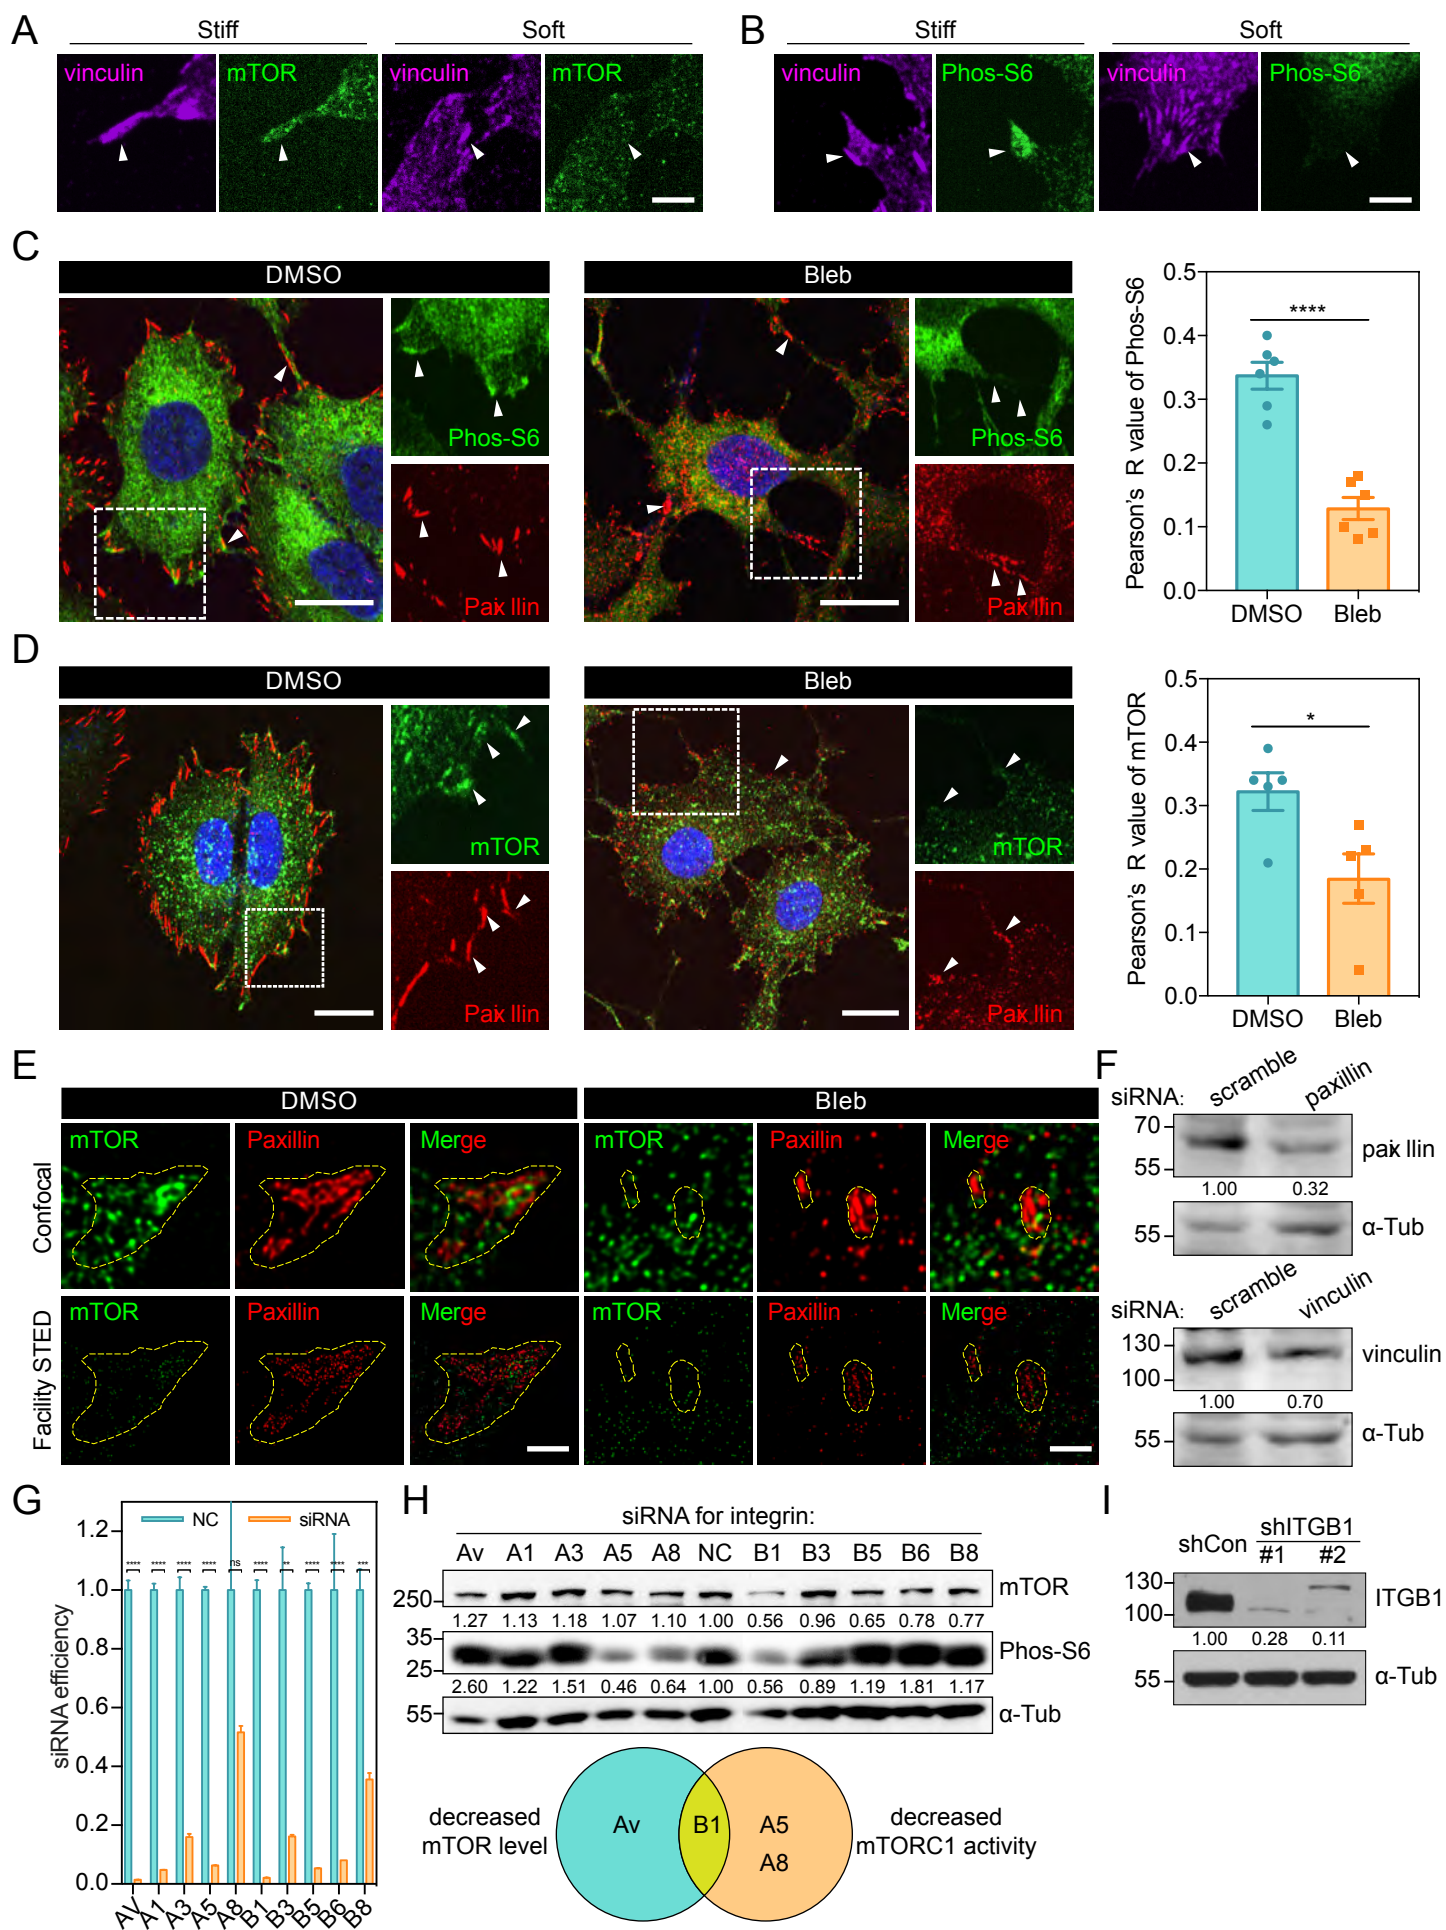

**Fig. S2. Cell contractility induced mTORC1 activation is regulated by integrin-FAs**

- (A) Representative immunofluorescence images stained with mTOR (green) and vinculin (magenta) antibodies in MDA-MB-231 cells plated on stiff or soft substrates. Scale bar, 5  $\mu\text{m}$ .
- (B) Representative immunofluorescence images stained with Phos-S6 (green) and vinculin (magenta) antibodies in MDA-MB-231 cells plated on stiff or soft substrates. Scale bar, 5  $\mu\text{m}$ .
- (C) Left: representative immunofluorescence images stained with Phos-S6 (green) and paxillin (red) antibodies in MDA-MB-231 cells treated with DMSO or Bleb. Co-localization of Phos-S6 and paxillin is shown in enlarged boxes by white arrow heads. Scale bar, 20  $\mu\text{m}$ . Right: Pearson's R value represents the overlap coefficient of Phos-S6 and paxillin ( $N_{\text{DMSO}} = 6$ ,  $N_{\text{Bleb}} = 6$ , error bar: mean with SEM, \*\*\*\* $p < 0.0001$  by unpaired Student's  $t$  test).
- (D) Left: representative immunofluorescence images stained with mTOR (green) and paxillin (red) antibodies in MDA-MB-231 cells treated with DMSO or Bleb. Co-localization of mTOR and paxillin is shown in enlarged boxes by white arrow heads. Scale bar, 20  $\mu\text{m}$ . Right: Pearson's R value represents the overlap coefficient of mTOR and paxillin ( $N_{\text{DMSO}} = 5$ ,  $N_{\text{Bleb}} = 5$ , error bar: mean with SEM, \* $p = 0.0247$  by unpaired Student's  $t$  test).
- (E) Representative images of confocal (top) and STED (bottom) showing the co-localization of mTOR (green) and paxillin (red) in MDA-MB-231 cells treated with DMSO or Bleb. Scale bar, 5  $\mu\text{m}$ .
- (F) Western blot showing the successful silencing of paxillin (top) and vinculin (bottom) in MDA-MB-231 cells using siRNA.  $\alpha$ -tubulin is used as loading control.
- (G) The knocked down efficiency of siRNA for integrin AV/A1/A3/A5/A8/B1/B3/B5/B6/B8 quantified by qPCR assay (error bar: mean with SEM, \*\*\*\* $p < 0.0001$ , \*\*\* $p = 0.0010$ , \*\* $p = 0.0046$ , ns = 0.4953 by unpaired Student's  $t$  test).
- (H) Top: western blot showing the mTOR and Phos-S6 levels in siNC and integrin AV/A1/A3/A5/A8/B1/B3/B5/B6/B8 gene-silenced MDA-MB-231 cells. Bottom: Venn diagram showing the types of integrin that result in decreased mTOR protein levels and mTORC1 activity.
- (I) Western blot showing the successful silencing of ITGB1 in MDA-MB-231 cells.  $\alpha$ -tubulin is used as loading control.

Figure S3

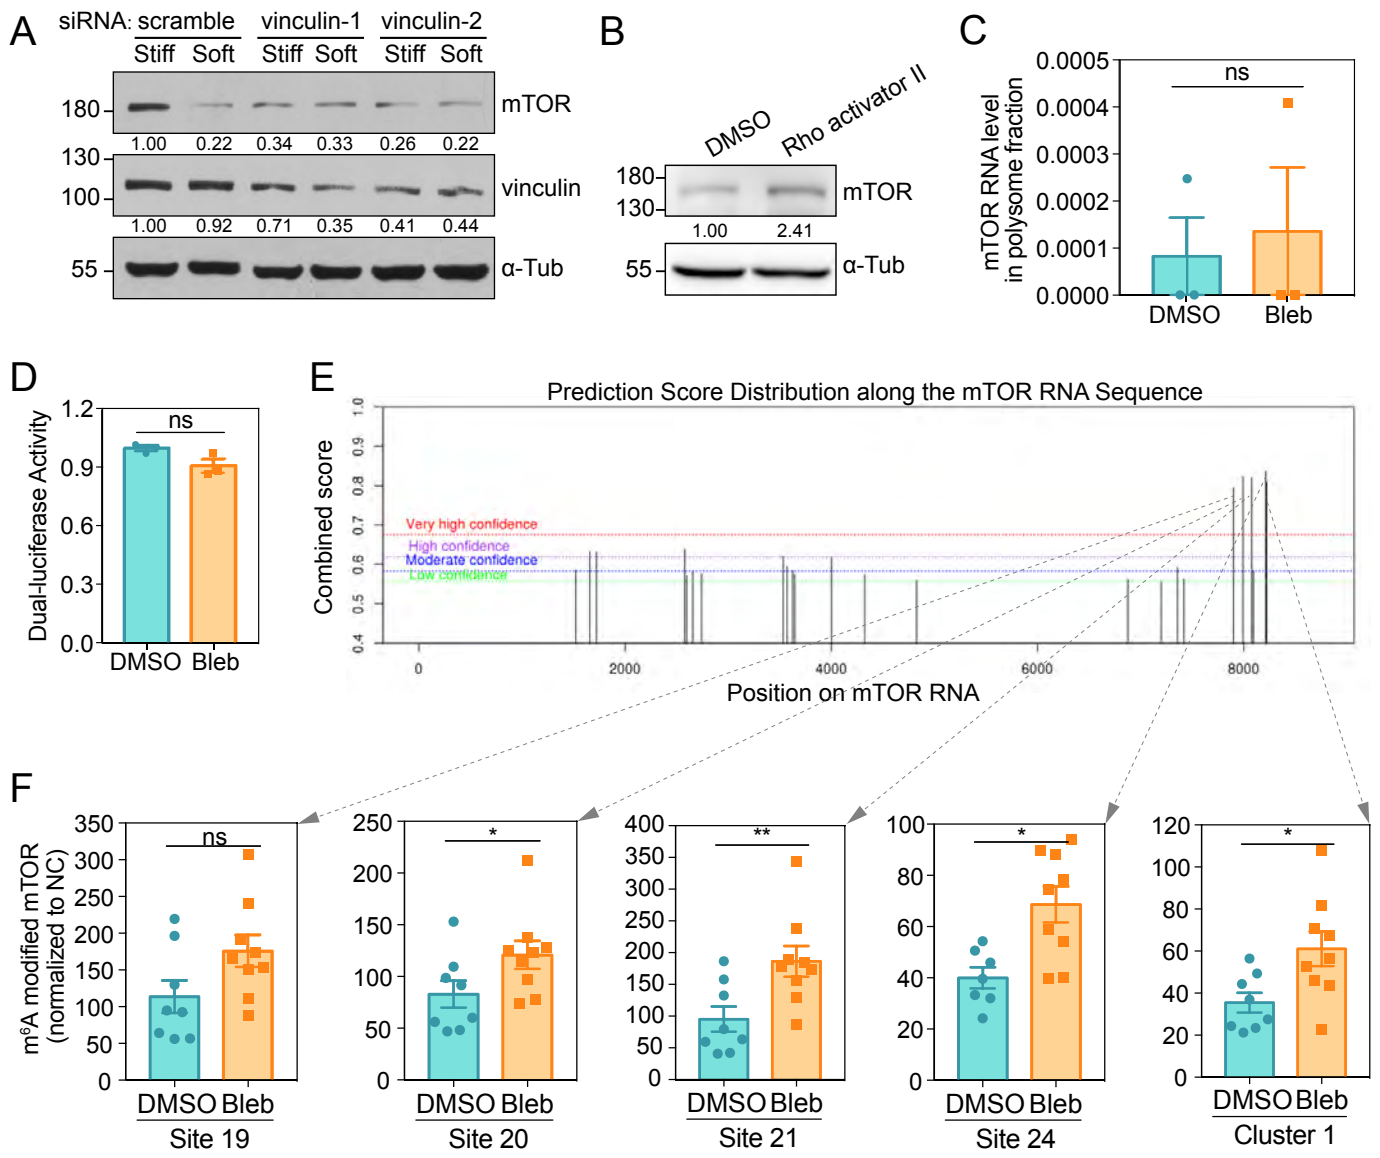

**Fig. S3. m<sup>6</sup>A modification of mTOR increases with reduced actomyosin contractility**

- (A) Western blot showing the mTOR and vinculin levels in scramble, si-vinculin-1, si-vinculin-2 MDA-MB-231 cells cultured on stiff or soft substrates.  $\alpha$ -tubulin is used as loading control.
- (B) Western blot showing the mTOR levels in cells treated with DMSO or Rho activator II.  $\alpha$ -tubulin is used as loading control.
- (C) The abundance of mTOR transcripts was measured by RT-qPCR in polysome fraction from the polysome profiling (error bar: mean with SEM, ns = 0.7542 by unpaired Student's *t* test).
- (D) Dual-luciferase reporter assay showing transcriptional activity of mTOR mRNA in MDA-MB-231 cells treated with DMSO or Bleb ( $N_{\text{DMSO}} = N_{\text{Bleb}} = 3$  independent experiments, error bar: mean with SEM, ns = 0.0700 by unpaired Student's *t* test).
- (E) Prediction by SRAMP showing the potential m<sup>6</sup>A modification positions on mTOR mRNA sequence and its combined confidence score.
- (F) The ratios of m<sup>6</sup>A modified mTOR on site 19, site 20, site 21, site 24 and cluster 1 in DMSO and Bleb treatment groups ( $N_{\text{DMSO}} = N_{\text{Bleb}} = 3$  independent experiments, error bar: mean with SEM, ns = 0.0564, \* $p_{\text{Site20}} = 0.0267$ , \*\* $p_{\text{Site21}} = 0.0038$ , \* $p_{\text{Site24}} = 0.0332$ , \* $p_{\text{Cluster1}} = 0.0176$  by paired Student's *t* test).





**Fig. S4. The stability of mTOR transcripts is regulated by YTHDF2**

- (A) Western blot showing the mTOR and Phos-S6 levels in shControl, shMETTL3, shMETTL14, shWTAP and shVIRMA cells cultured on stiff or soft substrates.  $\alpha$ -tubulin is used as loading control.
- (B) Western blot showing the levels of METTL3/METTL14/WTAP/ALKBH5 in shControl and corresponding shRNA-targeted MDA-MB-231 cells.  $\alpha$ -tubulin is used as loading control.
- (C) The knocked down efficiency of VIRMA quantified by qPCR assay (error bar: mean with SEM, \*\*\*\* $p < 0.0001$  by unpaired Student's  $t$  test).
- (D) Western blot showing the levels of FTO in WT and FTO KO MDA-MB-231 cells. GAPDH is used as loading control.
- (E) Western blot showing the levels of mTOR and Phos-S6 in shControl and shALKBH5 cells cultured on stiff or soft substrates.  $\alpha$ -tubulin is used as loading control.
- (F) Western blot showing the levels of mTOR and Phos-S6 in MDA-MB-231 cells supplemented with DMSO or meclufenamic acid (MA) on stiff or soft substrates.  $\alpha$ -tubulin is used as loading control.
- (G) Western blot showing the successful silencing of YTHDF2 in MDA-MB-231 cells. GAPDH is used as loading control.
- (H) qPCR assay showing the remaining mTOR RNA level in shControl and shYTHDF2 cells after transcription inhibition using Actinomycin D on stiff or soft substrates ( $N_{\text{soft}} = N_{\text{stiff}} = 3$  independent experiments, error bar: mean with SEM, \* $p = 0.0206$ , \*\* $p = 0.0044$  by unpaired Student's  $t$  test).
- (I) Western blot showing the mTOR and Phos-S6 levels in shControl and shYTHDF2 cells on stiff or soft substrates.  $\alpha$ -tubulin is used as loading control.
- (J) Schematic diagram of IP-MS detecting the interaction between GSK3 $\beta$  and FTO.
- (K) Representative images of overexpressed GSK3 $\beta$ -AcGFP in MDA-MB-231 cells indicating its localization at the ventral side of cells. The dashed boxes are zoomed in on the right. Scale bar, 20  $\mu\text{m}$  and 5  $\mu\text{m}$ .
- (L) Western blot showing the Phos-GSK3 $\beta$  (S9) levels in WT and shIGTB1 cells supplemented with Cilengitide. The asterisk indicates a nonspecific band.  $\alpha$ -tubulin is used as loading control.

(M) Western blot showing phos-GSK3 $\beta$  and total GSK3 $\beta$  levels in MDA-MB-231 cells plated on stiff or soft substrates.  $\alpha$ -tubulin is used as loading control.

Figure S5

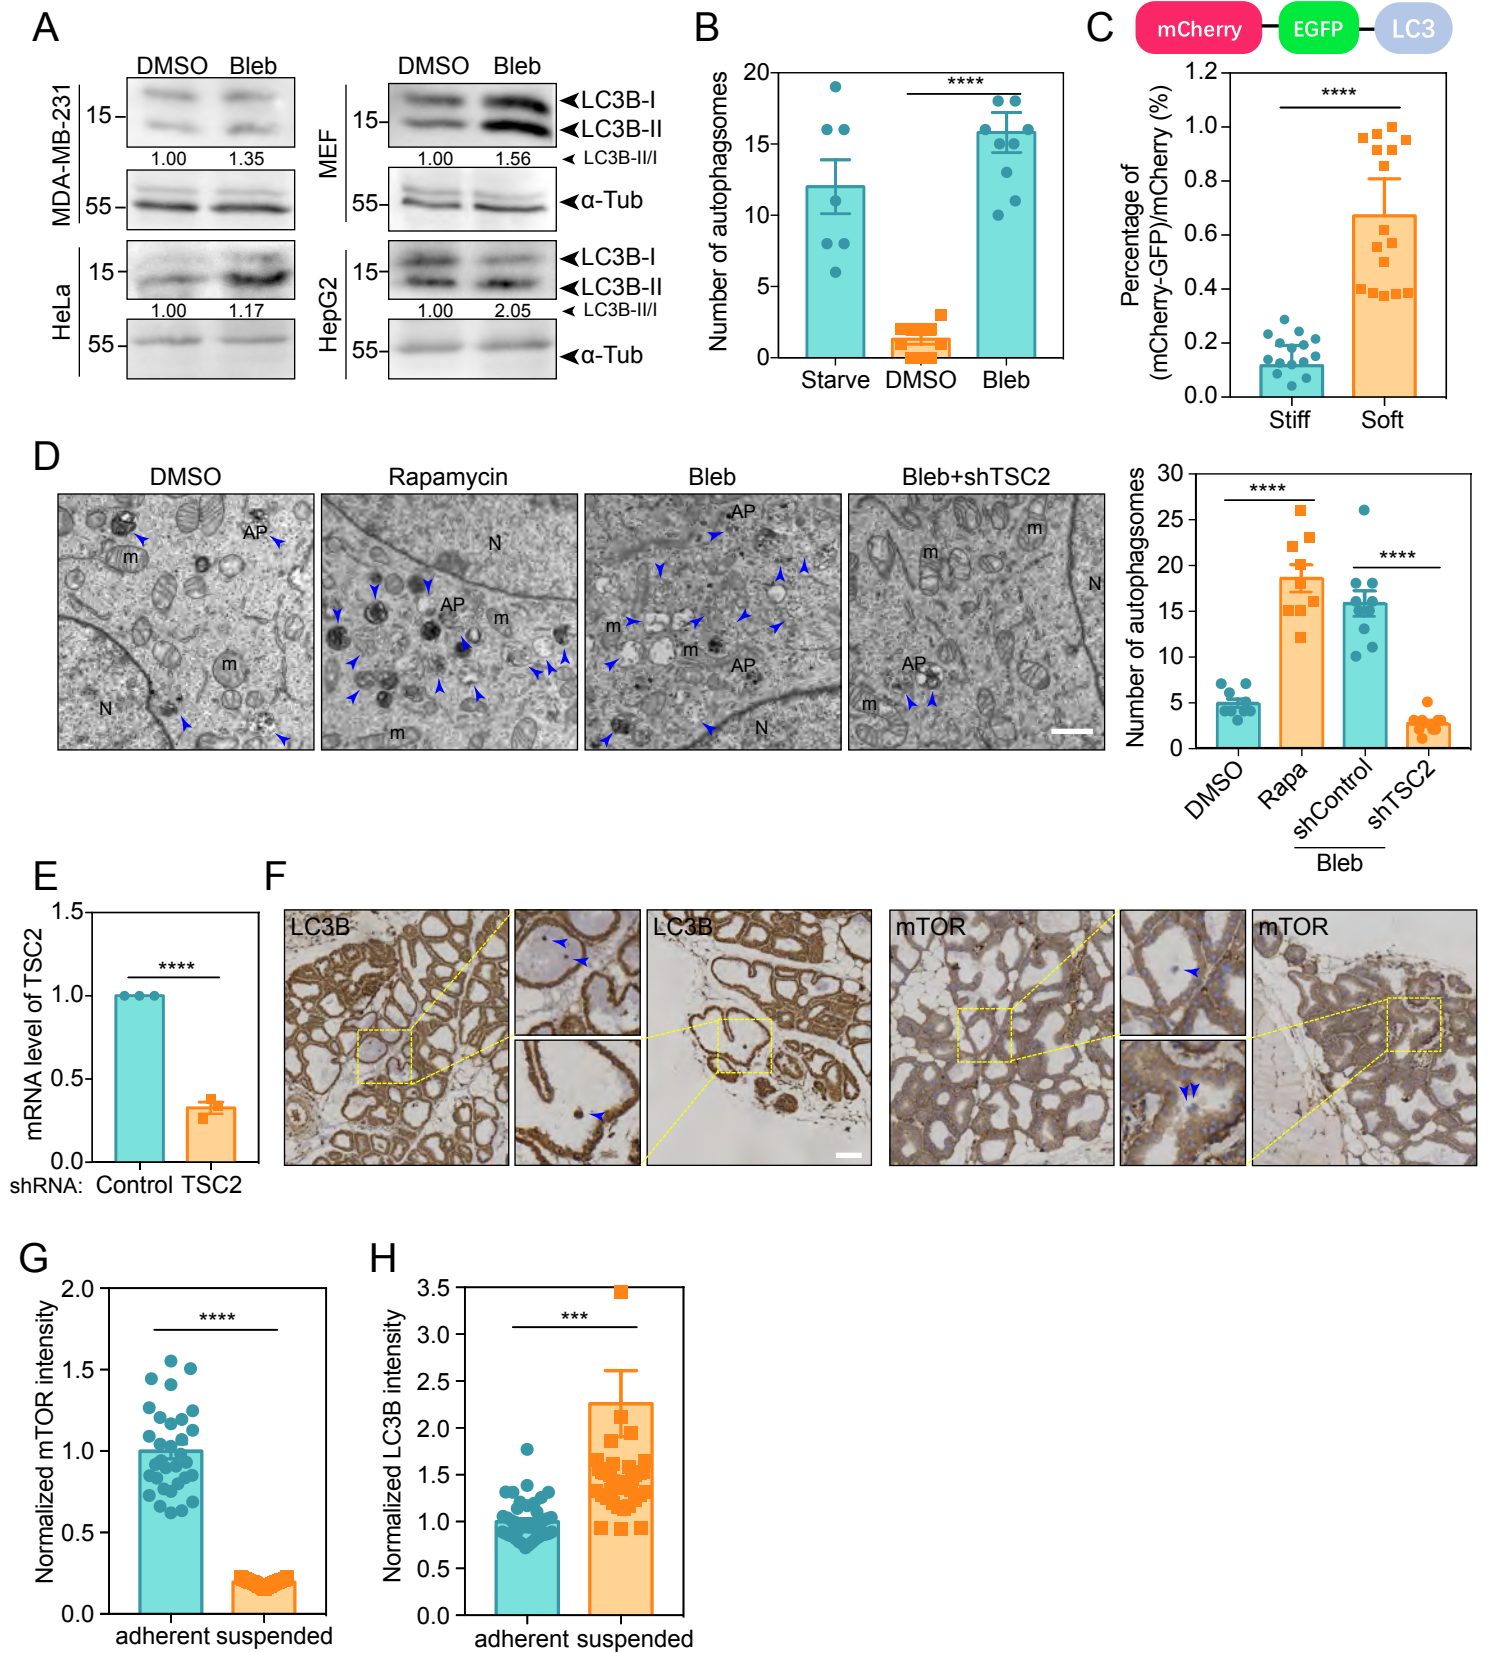

**Fig. S5. ECM detachment hampers mTORC1 pathway and elevates autophagy in animal models**

- (A) Western blot showing the autophagy maker LC3B levels in MDA-MB-231, HeLa, MEF and HepG2 cells with or without Bleb treatment.  $\alpha$ -tubulin is used as loading control.
- (B) Quantification of autophagosomes number in TEM images of MDA-MB-231 cells under starve condition or treated with DMSO or Bleb ( $N_{\text{starve}} = 7$ ,  $N_{\text{DMSO}} = 10$ ,  $N_{\text{Bleb}} = 9$ , error bar: mean with SEM, \*\*\*\* $p < 0.0001$  by unpaired Student's  $t$  test).
- (C) Top: schematic diagram of fluorescent tandem mCherry-EGFP-LC3 probe. Bottom: quantification of intensity of (mCherry-GFP) / mCherry on stiff and soft substrates ( $N_{\text{stiff}} = 15$ ,  $N_{\text{soft}} = 16$ , error bar: mean with SEM, \*\*\*\* $p < 0.0001$  by unpaired Student's  $t$  test).
- (D) Left: representative TEM images of MDA-MB-231 cells or shTSC2 cells treated with DMSO, Rapamycin, Bleb by chemical-fixation. The blue arrow heads indicate autophagosomes. The letter "N" stands for the nucleus and "m" stands for mitochondria. Scale bar, 1  $\mu\text{m}$ . Right: quantification of autophagosomes number in images on the left ( $N_{\text{DMSO}} = N_{\text{Rapamycin}} = N_{\text{Bleb}} = N_{\text{Bleb+shTSC2}} = 9$ , error bar: mean with SEM, \*\*\*\* $p < 0.0001$  by unpaired Student's  $t$  test).
- (E) The knocked down efficiency of TSC2 quantified by qPCR assay (error bar: mean with SEM, \*\*\*\* $p < 0.0001$  by unpaired Student's  $t$  test).
- (F) Immunohistochemistry images showing the detection of mTOR and LC3B in lactating mammary glands sections from BALB/c mice. The yellow dashed boxes are zoomed in on the right. The blue arrow heads indicate ECM-detached cells. Scale bar, 100  $\mu\text{m}$ .
- (G) Quantification of mTOR fluorescence intensity in flank (adherent) and cavity (suspended) tumor cells in the nude mouse model of malignant ascites ( $N_{\text{adherent}} = 32$ ,  $N_{\text{suspended}} = 43$  cells, error bar: mean with SEM, \*\*\*\* $p < 0.0001$  by unpaired Student's  $t$  test).
- (H) Quantification of LC3B fluorescence intensity in flank (adherent) and cavity (suspended) tumor cells in the nude mouse model of malignant ascites ( $N_{\text{adherent}} = 43$ ,  $N_{\text{suspended}} = 46$  cells, error bar: mean with SEM, \*\*\* $p = 0.0008$  by unpaired Student's  $t$  test).
